# Supplementary material for: Concise synthesis of 22-hydroxyacuminatine, cytotoxic camptothecinoid from Camptotheca acuminata, by pyridone benzannulation
Source: Royal Society of Chemistry journal article supplement (doi:10.1039/b516154a), 2005-12-14
Supplement: b514532e.pdf [file b514532e.pdf]

# Concise synthesis of 22-Hydroxyacuminatine, cytotoxic camptothecinoid from *Camptotheca acuminata*, by pyridone benzannulation

Matej Babjak, Alice Kanazawa\*, Regan J. Anderson and Andrew E. Greene

Université Joseph Fourier de Grenoble, Chimie Recherche (LEDSS)

38041, Grenoble, France

## Electronic Supplementary Information

### Methyl (2*E*,4*E*)-5-(5-Oxo-1,2,3,5-tetrahydroindolizin-6-yl)penta-2,4-dienoate (6).

Yellow–orange crystals, mp 171-173 °C (ethyl acetate–pentane);  $R_f$  0.43 (ethyl acetate); IR (Nujol) 1716, 1636, 1615, 1540, 1377;  $^1\text{H}$  NMR (300 MHz,  $\text{CDCl}_3$ )  $\delta$  2.22 (tt,  $J = 7.5$ , 7.5 Hz, 2 H), 3.12 (t,  $J = 7.5$  Hz, 2 H), 3.75 (s, 3 H), 4.19 (t,  $J = 7.5$  Hz, 2 H), 5.96 (d,  $J = 14.7$  Hz, 1 H), 6.17 (d,  $J = 6.8$  Hz, 1 H), 6.87 (d,  $J = 14.7$  Hz, 1 H), 7.40 (dd,  $J = 14.7$ , 14.7 Hz, 1 H), 7.43 (d,  $J = 6.8$  Hz, 1 H), 7.51 (dd,  $J = 14.7$ , 14.7 Hz, 1 H);  $^{13}\text{C}$  NMR (75.5 MHz,  $\text{CDCl}_3$ )  $\delta$  21.1 ( $\text{CH}_2$ ), 31.9 ( $\text{CH}_2$ ), 48.9 ( $\text{CH}_3$ ), 51.3 ( $\text{CH}_2$ ), 101.4 (CH), 120.0 (CH), 123.4 (C), 127.7 (CH), 136.4 (CH), 139.2 (CH), 146.1 (CH), 150.7 (C), 160.4 (C), 167.6 (C); MS (DCI,  $\text{NH}_3$ +isobutane)  $m/z$  246 ( $\text{MH}^+$ ); Anal. Calcd for  $\text{C}_{14}\text{H}_{15}\text{NO}_3$ : C, 68.56; H, 6.16; N, 5.71. Found: C, 68.54; H, 6.25; N, 5.72.

### Methyl 5-Oxo-1,2,3,5-tetrahydropyrrolo[1,2-*b*]isoquinoline-9-carboxylate (7).

Pale yellow crystals, mp 151-152 °C (ethyl acetate–ether);  $R_f$  0.60 (ethyl acetate); IR (Nujol) 1718, 1652, 1625, 1590, 1429, 1399, 1377;  $^1\text{H}$  NMR (200 MHz,  $\text{CDCl}_3$ )  $\delta$  2.22 (tt,  $J = 7.2$ , 7.2 Hz, 2 H), 3.15 (t,  $J = 7.2$  Hz, 2 H), 3.95 (s, 1 H), 4.19 (t,  $J = 7.2$  Hz, 2 H), 7.42 (t,  $J = 7.9$  Hz, 1 H), 7.60 (s, 1 H), 8.28 (d,  $J = 7.9$  Hz, 1 H), 8.62 (d,  $J = 7.9$  Hz, 1 H);  $^{13}\text{C}$  NMR (75.5 MHz,  $\text{CDCl}_3$ )  $\delta$  21.8 ( $\text{CH}_2$ ), 31.7 ( $\text{CH}_2$ ), 48.1 ( $\text{CH}_2$ ), 52.1 ( $\text{CH}_3$ ), 98.1 (CH), 124.4 (CH), 124.9 (C), 125.9 (C), 132.5 (CH), 135.1 (CH), 137.8 (C), 145.8 (C), 161.1 (C), 167.4 (C); MS (DCI,  $\text{NH}_3$ +isobutane)  $m/z$  244 ( $\text{MH}^+$ ); HRMS calcd for  $\text{C}_{14}\text{H}_{14}\text{NO}_3$ : 244.0973. Found: 244.0985 ( $\text{MH}^+$ ).

### Methyl 1-Hydroxy-5-oxo-1,2,3,5-tetrahydropyrrolo[1,2-*b*]isoquinoline-9-carboxylate (8).

Pink–violet needles, mp 214-216 °C (ethyl acetate– $\text{CH}_2\text{Cl}_2$ );  $R_f$  0.32 (ethyl acetate); IR (Nujol) 1717, 1652, 1609, 1585, 1558, 1377, 1256;  $^1\text{H}$  NMR (300 MHz,  $\text{CD}_3\text{OD}$ – $\text{CDCl}_3$  1:1)  $\delta$  2.08 (m, 1 H), 2.43 (m, 1 H), 3.89 (s, 3 H), 3.98 (m, 1 H), 4.22 (m, 1 H), 5.16 (dd,  $J = 5.9$ , 6.9 Hz, 1 H), 7.43 (dd,  $J = 7.4$ , 7.4 Hz, 1 H), 7.74 (m, 1 H), 8.24 (pseudo d,  $J = 7.4$  Hz, 1 H), 8.49 (pseudo d,  $J = 7.4$  Hz, 1 H);  $^{13}\text{C}$  NMR (75.5 MHz,  $\text{CD}_3\text{OD}$ – $\text{CDCl}_3$  1:1)  $\delta$  31.3 ( $\text{CH}_2$ ), 45.1 ( $\text{CH}_2$ ), 51.7 ( $\text{CH}_3$ ), 72.1 (CH), 99.2 (CH), 124.9 (CH), 125.5 (C), 125.7 (C), 131.6 (CH), 135.1 (CH), 137.2 (C), 146.9 (C), 160.7 (C), 167.0 (C); MS (DCI,  $\text{NH}_3$ +isobutane)  $m/z$  260 ( $\text{MH}^+$ ), 241; HRMS calcd for  $\text{C}_{14}\text{H}_{14}\text{NO}_4$ : 260.0923. Found: 260.0933 ( $\text{MH}^+$ ).

**Methyl 1,5-Dioxo-1,2,3,5-tetrahydropyrrolo[1,2-*b*]isoquinoline-9-carboxylate (9).** Yellow–pale orange solid, mp 158-159 °C (ethyl acetate);  $R_f$  0.52 (ethyl acetate); IR (Nujol) 1738, 1726, 1709, 1644, 1617, 1599, 1396, 1377;  $^1\text{H}$  NMR (300 MHz,  $\text{CDCl}_3$ )  $\delta$  2.95 (t,  $J = 7.2$  Hz, 2 H), 4.07 (s, 3 H), 4.39 (t,  $J = 7.2$  Hz, 2 H), 7.68 (t,  $J = 7.5$  Hz, 1 H), 8.35 (s, 1 H), 8.40 (d,  $J = 7.5$  Hz, 1 H), 8.74 (d,  $J = 7.5$  Hz, 1 H);  $^{13}\text{C}$  NMR (75.5 MHz,  $\text{CDCl}_3$ )  $\delta$  33.9 ( $\text{CH}_2$ ), 41.4 ( $\text{CH}_2$ ), 52.5 ( $\text{CH}_3$ ), 102.5 (CH), 128.2 (CH), 128.4 (C), 129.2 (C), 132.2 (CH), 135.3 (C), 135.6 (C), 135.7 (CH), 160.7 (C), 166.5 (C), 197.4 (C); MS (DCI,  $\text{NH}_3$ +isobutane)  $m/z$  258 ( $\text{MH}^+$ ), 223, 194; HRMS calcd for  $\text{C}_{14}\text{H}_{12}\text{NO}_4$ : 258.0766. Found: 258.0772 ( $\text{MH}^+$ ).

**11-Oxo-11,12-dihydro-5,11a-diaza-dibenzo[*b,h*]fluorene-7-carboxylic Acid Methyl Ester (10).** Pale yellow solid, mp 264-266 °C (ethyl acetate);  $R_f$  0.68 (6% acetone– $\text{CH}_2\text{Cl}_2$ ); IR (Nujol) 1708, 1655, 1631, 1592, 1377;  $^1\text{H}$  NMR (300 MHz,  $\text{CDCl}_3$ )  $\delta$  4.06 (s, 3 H), 5.30 (s, 2 H), 7.54 (m, 2 H), 7.77 (m, 1 H), 8.19 (d,  $J = 8.4$  Hz, 1 H), 8.23 (s, 1 H), 8.34 (d,  $J = 7.9$  Hz, 1 H), 8.64 (s, 1 H), 8.70 (d,  $J = 7.9$  Hz, 1 H);  $^{13}\text{C}$  NMR (75.5 MHz,  $\text{CDCl}_3$ )  $\delta$  49.4 ( $\text{CH}_2$ ), 52.4 ( $\text{CH}_3$ ), 98.8 (CH), 125.9 (CH), 126.8 (C), 127.1 (C), 127.4 (CH), 127.9 (CH), 128.0 (C), 128.7 (C), 129.7 (CH), 129.8 (C), 130.1 (CH), 130.5 (CH), 132.2 (CH), 135.5 (CH), 137.1 (C), 141.4 (C), 148.9 (C), 160.5 (C), 167.1 (C); MS (DCI,  $\text{NH}_3$ +isobutane)  $m/z$  343 ( $\text{MH}^+$ ), 299, 285, 244, 223; HRMS calcd for  $\text{C}_{21}\text{H}_{15}\text{N}_2\text{O}_3$ : 343.1083. Found: 343.1081 ( $\text{MH}^+$ ).

**7-Hydroxymethyl-12H-5,11a-diaza-dibenzo[*b,h*]fluoren-11-one (22-Hydroxyacuminatine) (3).** Pale yellow solid, mp 290-295 °C ( $\text{CH}_3\text{OH}$ – $\text{CH}_2\text{Cl}_2$ , dec);  $R_f$  0.37 (4%  $\text{CH}_3\text{OH}$ –48% ethyl acetate–48%  $\text{CH}_2\text{Cl}_2$ ); UV  $\lambda_{\text{max}}$  nm (log  $\epsilon$ ) 222 (4.45), 251 (4.46), 285 (3.99), 366 (4.13), 378 (4.14); IR (Nujol) 3361, 1653, 1613, 1595, 1505, 1377;  $^1\text{H}$  NMR (300 MHz,  $\text{DMSO-}d_6$ )  $\delta$  4.92 (d,  $J = 5.5$  Hz, 1 H), 5.30 (s, 2 H), 5.46 (t,  $J = 5.5$  Hz, 2 H), 7.53 (t,  $J = 7.7$  Hz, 1 H), 7.64 (m,  $J = 7.7$  Hz, 1 H), 7.66 (s, 1 H), 7.80 (m, 2 H), 8.04 (d,  $J = 7.2$  Hz, 1 H), 8.16 (d,  $J = 8.4$  Hz, 1 H), 8.25 (d,  $J = 8.2$  Hz, 1 H), 8.58 (s, 1 H);  $^{13}\text{C}$  NMR (75.5 MHz,  $\text{DMSO-}d_6$ )  $\delta$  49.3 ( $\text{CH}_2$ ), 61.1 ( $\text{CH}_2$ ), 96.0 (CH), 125.7 (CH), 125.8 (C), 126.5 (CH), 127.1 (CH), 127.7 (C), 128.3 (CH), 128.7 (CH), 129.5 (C), 130.0 (CH), 130.9 (CH), 131.1 (CH), 135.1 (C), 138.3 (C), 139.9 (C), 147.7 (C), 153.1 (C), 159.7 (C); MS (DCI,  $\text{NH}_3$ +isobutane)  $m/z$  315 ( $\text{MH}^+$ ), 260, 244; MS (EI, 70eV)  $m/z$  314 ( $\text{M}^+$ ), 297, 285, 268, 255; HRMS calcd for  $\text{C}_{20}\text{H}_{15}\text{N}_2\text{O}_2$ : 315.1134. Found: 315.1138 ( $\text{MH}^+$ ).
